# Supplementary material for: Dopant-compensated Cs2AgBiBr6−xClx single crystals for photo-imaging and X-ray detection
Source: Royal Society of Chemistry journal article supplement (doi:10.1039/d2tc03905b), 2022-01-01
Supplement: d2tc03905b1.pdf [file d2tc03905b1.pdf]

## Supporting information

### **Dopant-compensated Cs<sub>2</sub>AgBiBr<sub>6-x</sub>Cl<sub>x</sub> single crystals for photo-imaging and X-ray detection**

Qi Shao<sup>a,†</sup>, Jun Yan<sup>a,†</sup>, Weiqiang Gong<sup>a</sup>, Yan Li<sup>b</sup>, Feng Gao<sup>a</sup>, Baoning Wang<sup>a,\*</sup> and Lin Li<sup>a,\*</sup>

<sup>a</sup> Key Laboratory for Photonic and Electronic Bandgap Materials, Ministry of Education, School of Physics and Electronic Engineering, Harbin Normal University  
Harbin 150025, China.

E-mail: [physics\\_lin@hotmail.com](mailto:physics_lin@hotmail.com); [lil@hrbnu.edu.cn](mailto:lil@hrbnu.edu.cn); [bn\\_wang@hrbnu.edu.cn](mailto:bn_wang@hrbnu.edu.cn)

<sup>b</sup> Heilongjiang Institute of Atomic Energy, Harbin 150025, China.

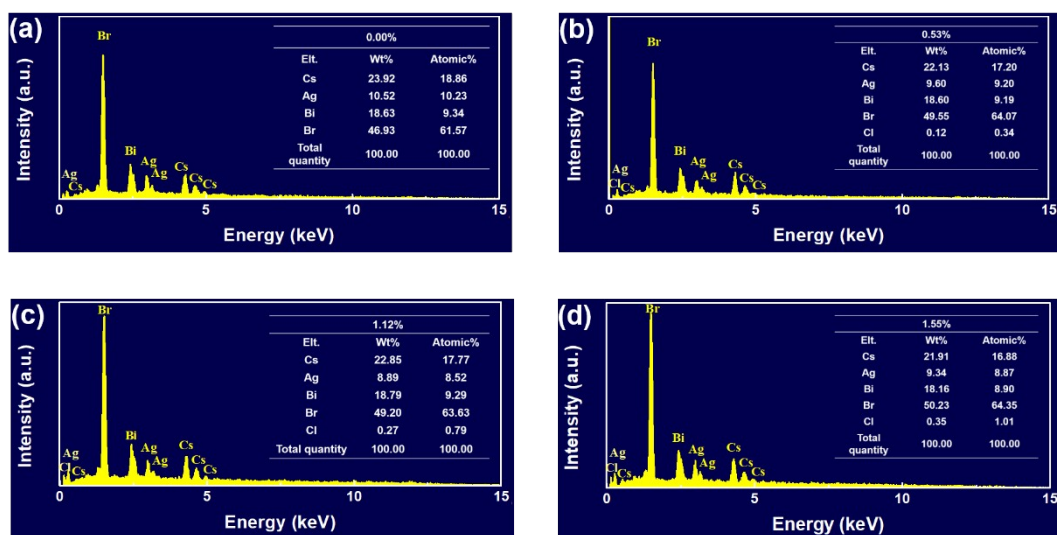

**Fig. S1** The EDS spectrum for the  $\text{Cs}_2\text{AgBiBr}_{6-x}\text{Cl}_x$  SCs with different  $\text{Cl}^-$  doping ratios. (a) 0.00%, (b) 0.53%, (c) 1.12%, and (d) 1.55%..

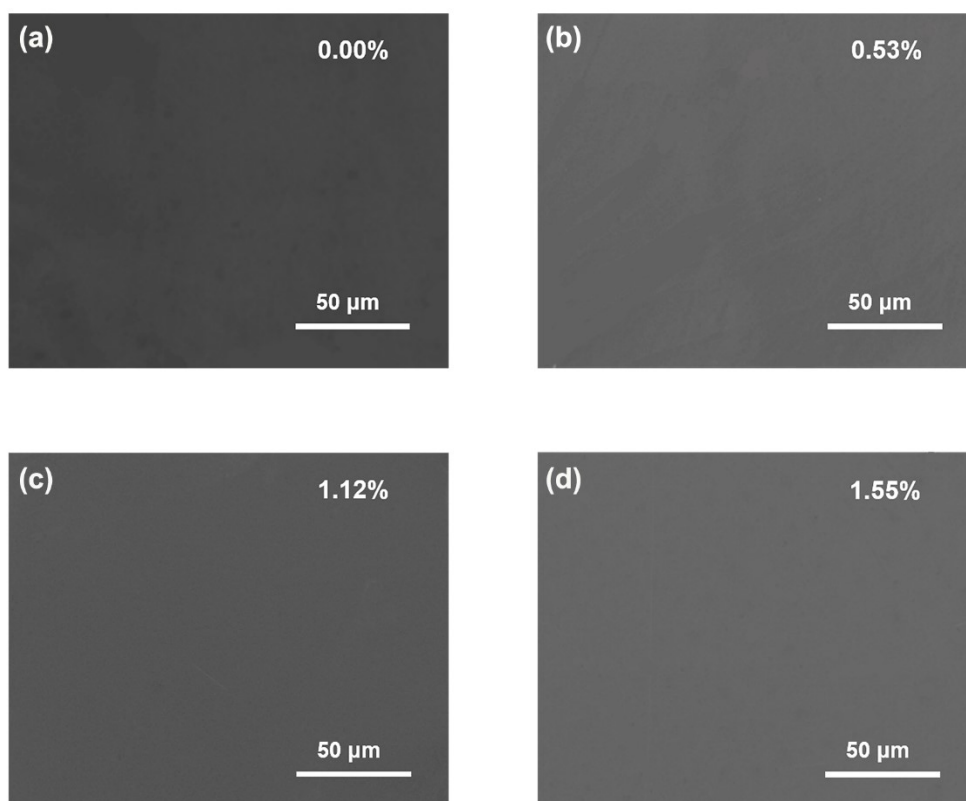

**Fig. S2** The SEM images of the Cs<sub>2</sub>AgBiBr<sub>6-x</sub>Cl<sub>x</sub> SCs with different Cl<sup>-</sup> doping ratios. (a) 0.00%, (b) 0.53% (c) 1.12% and (d) 1.55%.

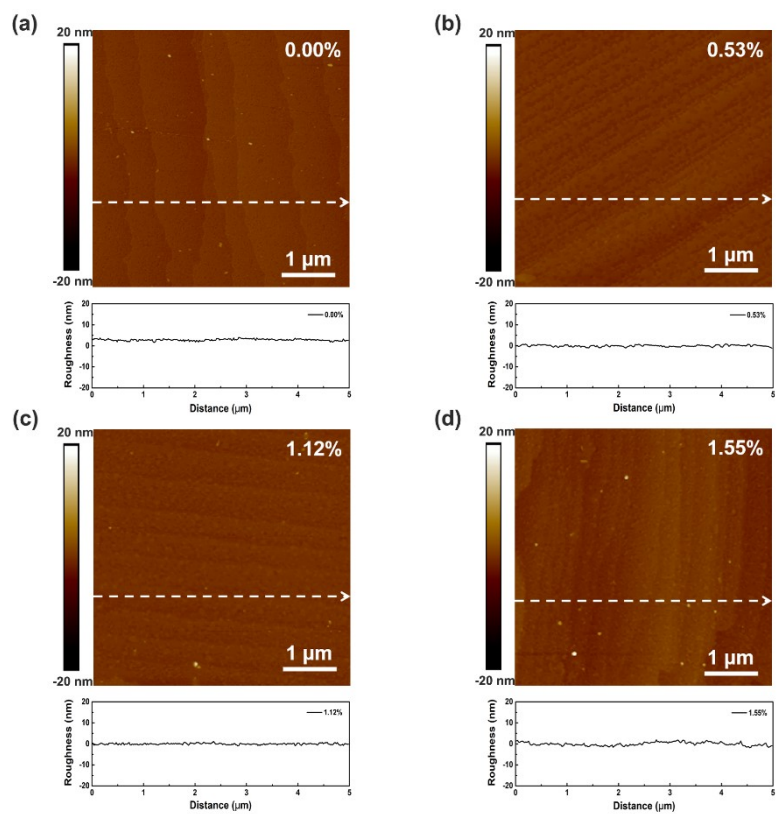

**Fig. S3.** The AFM images of the  $\text{Cs}_2\text{AgBiBr}_{6-x}\text{Cl}_x$  SCs with different  $\text{Cl}^-$  doping ratios. (a) 0.00%, (b) 0.53% (c) 1.12% and (d) 1.55%.

**Table S1.** Ionic radius in  $\text{Cs}_2\text{AgBiBr}_{6-x}\text{Cl}_x$ .

| Ions                    | $\text{Cs}^+$ | $\text{Ag}^+$ | $\text{Bi}^{3+}$ | $\text{Br}^-$ | $\text{Cl}^-$ |
|-------------------------|---------------|---------------|------------------|---------------|---------------|
| Radius ( $\text{\AA}$ ) | 1.67          | 1.15          | 1.03             | 1.96          | 1.81          |

**Table S2.** The octahedral factors and tolerance factors of  $\text{Cs}_2\text{AgBiBr}_{6-x}\text{Cl}_x$ .

| Cl amount         | 0.00%   | 0.53%   | 1.12%   | 1.55%   |
|-------------------|---------|---------|---------|---------|
| octahedral factor | 0.55612 | 0.55635 | 0.55661 | 0.55680 |
| tolerance factor  | 0.84157 | 0.84160 | 0.84164 | 0.84168 |

Hall effect measurement was conducted on SCs with the size of  $3 \times 3 \times 2 \text{ mm}^3$  in dark using Nanometrics HL5500 Hall System.

**Table S3.** The measured resistivity, majority carrier concentration and mobility of  $\text{Cs}_2\text{AgBiBr}_{6-x}\text{Cl}_x$

| Cl amount | Resistivity ( $\Omega \text{ cm}$ ) | Carrier concentration ( $\text{cm}^{-3}$ ) | Mobility ( $\text{cm}^2\text{V}^{-1}\text{s}^{-1}$ ) |
|-----------|-------------------------------------|--------------------------------------------|------------------------------------------------------|
| 0.00%     | $9.484 \times 10^6$                 | $2.407 \times 10^{10}$                     | 27.3                                                 |
| 0.53%     | $2.39 \times 10^9$                  | $3.722 \times 10^7$                        | 70.3                                                 |
| 1.12%     | $1.068 \times 10^{10}$              | $4.512 \times 10^6$                        | 129.0                                                |
| 1.55%     | $1.817 \times 10^{11}$              | $2.076 \times 10^6$                        | 16.5                                                 |

SC detectors with different  $\text{Cl}^-$  doping ratios.

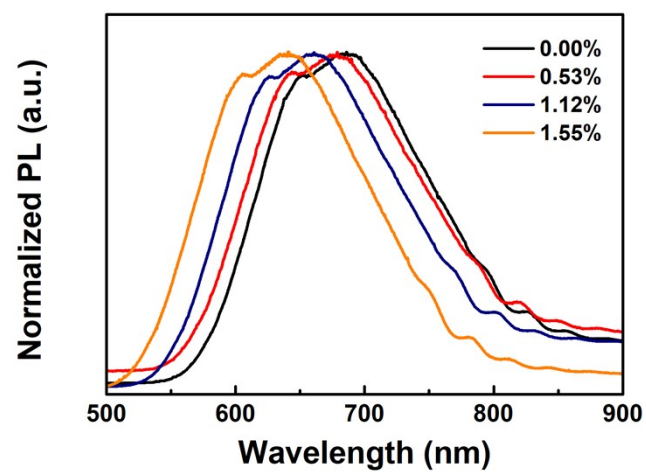

**Fig. S4.** PL spectra of the Cs<sub>2</sub>AgBiBr<sub>6-x</sub>Cl<sub>x</sub> SCs with different Cl<sup>-</sup> ratios.

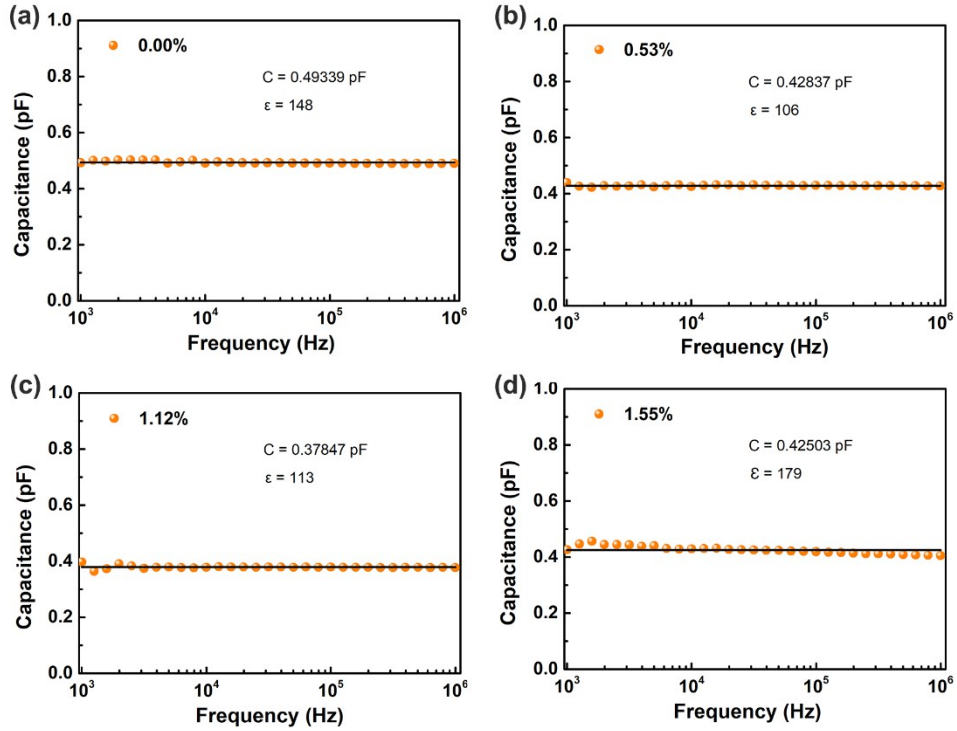

**Fig. S5** Capacitance of Au/Cs<sub>2</sub>AgBiBr<sub>6-x</sub>Cl<sub>x</sub>/Au parallel plate capacitor.

**Note S1.** The calculation of Cs<sub>2</sub>AgBiBr<sub>6-x</sub>Cl<sub>x</sub> SCs relative dielectric constant

A simple plate capacitor was built to measure the relative dielectric constant of Cs<sub>2</sub>AgBiBr<sub>6-x</sub>Cl<sub>x</sub> SC. Device configuration was Au/Cs<sub>2</sub>AgBiBr<sub>6-x</sub>Cl<sub>x</sub>/Au, and the Cs<sub>2</sub>AgBiBr<sub>6-x</sub>Cl<sub>x</sub> SC was served as the dielectric layer. By measuring the capacitance-frequency at dark, as shown in Figure S3. The relative dielectric constant was obtained by using the parallel plate capacitor model:

$$C = \epsilon \epsilon_0 S / D$$

where S is the electrode area (0.75 mm<sup>2</sup>), D is the thickness of Cs<sub>2</sub>AgBiBr<sub>6-x</sub>Cl<sub>x</sub> SC (0.00%: 2.00 mm; 0.53%: 1.65 mm; 1.12%: 1.98 mm; 1.55%: 2.5 mm).

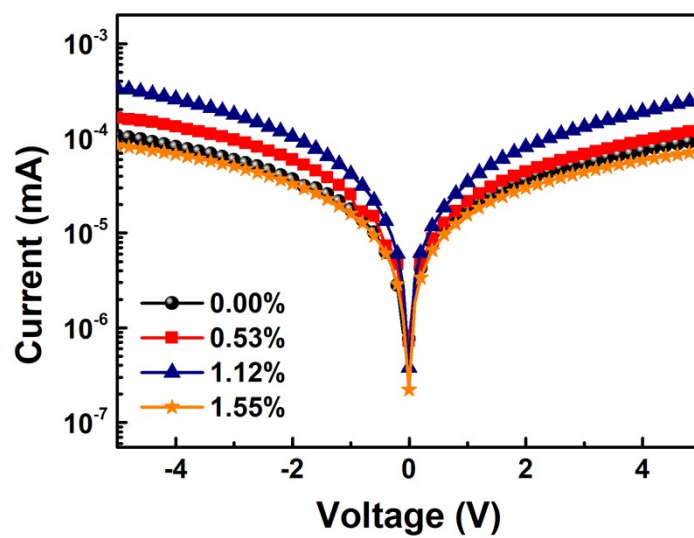

**Fig. S6** The  $I$ - $V$  curves of the SC devices with  $\text{Cl}^-$  doping ratio of 0.00%, 0.53%, 1.12% and 1.55% at  $2 \text{ mW cm}^{-2}$  conditions.

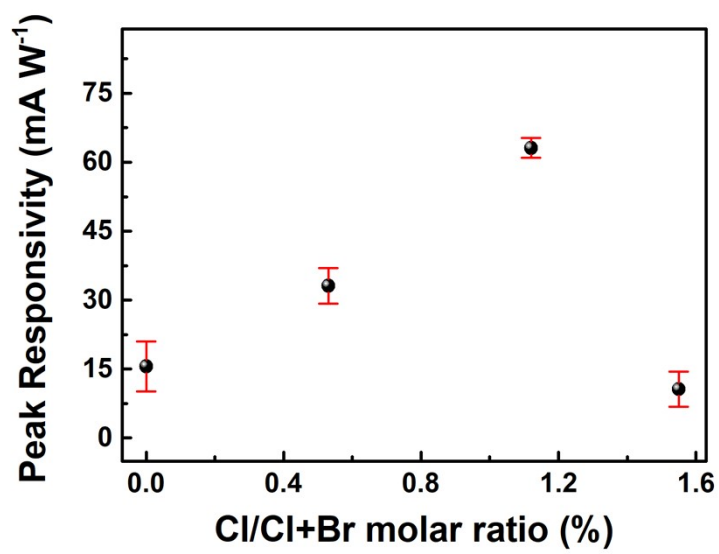

**Fig. S7** Peak response of the Cs<sub>2</sub>AgBiBr<sub>6-x</sub>Cl<sub>x</sub> SC detectors with different Cl<sup>-</sup> ratios at 5 V.

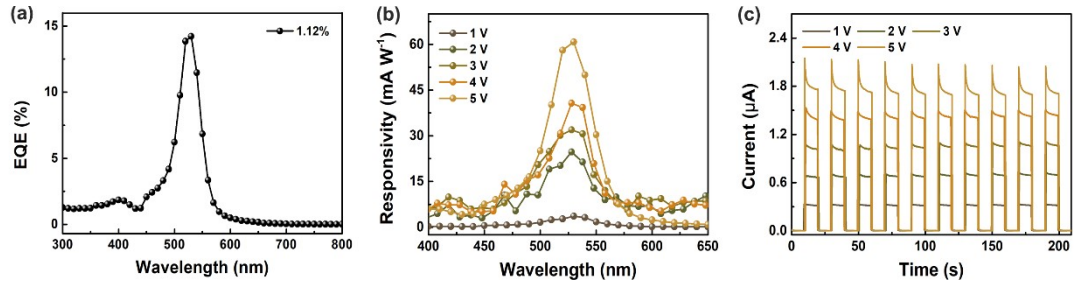

**Fig. S8** (a) The EQE spectrum for the  $\text{Cs}_2\text{AgBiBr}_{5.933}\text{Cl}_{0.067}$  photodetector at 5 V. (b) The photoresponse curves of  $\text{Cs}_2\text{AgBiBr}_{5.933}\text{Cl}_{0.067}$  SC at different bias. (c) Time-dependent response of the  $\text{Cs}_2\text{AgBiBr}_{5.933}\text{Cl}_{0.067}$  SC devices under different bias.

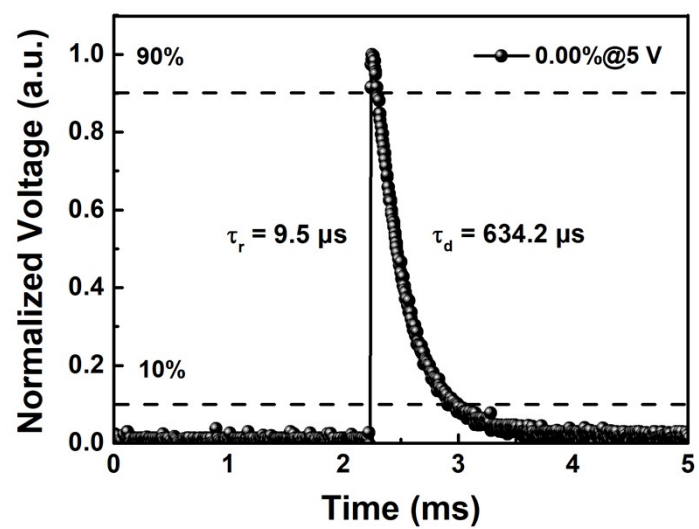

**Fig. S9** The Time-resolved response for the  $\text{Cs}_2\text{AgBiBr}_6$  SC photodetector at 5 V under the excitation of 532 nm pulsed laser.

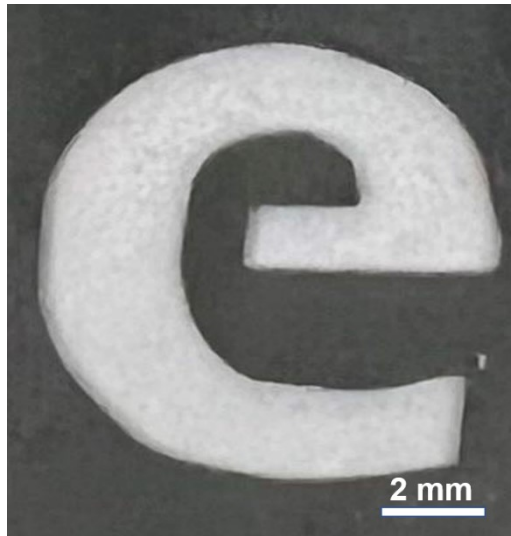

**Fig. S10** The object of the imaging system with letter “e”.

**Table S4.** The sensitivity of  $\text{Cs}_2\text{AgBiBr}_{6-x}\text{Cl}_x$  SC detectors with different Cl ratios.

| Cl ratios                                                        | 0.00% | 0.53% | 1.12% | 1.55% |
|------------------------------------------------------------------|-------|-------|-------|-------|
| Sensitivity ( $\mu\text{C Gy}_{\text{air}}^{-1}\text{cm}^{-2}$ ) | 512   | 542   | 714   | 243   |
